# Supplementary material for: Extreme Rainfall Indices in Southern Levant and Related Large-Scale Atmospheric Circulation Patterns: A Spatial and Temporal Analysis
Source: MDPI journal article supplement (doi:10.3390/w14233799), 2022-11-22
Supplement: s1 [file s1]

Table S1. List of stations where change points in daily rainfall were detected.

| Station | Name              | Latitude (°N) | Longitude (°E) | Change points |
|---------|-------------------|---------------|----------------|---------------|
| 1       | Regba             | 35.098        | 32.9755        | 6/2/2013      |
| 2       | Kefar Hamakkabbi  | 35.1134       | 32.7915        | 22/10/2000    |
| 3       | Nir Ezyon         | 34.989        | 32.699         | 1/2/2013      |
| 4       | Ramat Hashofet    | 35.0969       | 32.6121        | 31/1/2013     |
| 5       | Palmahim          | 34.7053       | 31.934         | 18/10/1989    |
| 6       | Kefar Menahem     | 34.8346       | 31.7333        | 22/2/2016     |
| 7       | Parod             | 35.4330       | 32.9322        | 17/3/1991     |
| 8       | Hazore'im         | 35.5038       | 32.7433        | 12/2/2005     |
| 9       | Kefar Yehezqel    | 35.3617       | 32.565         | 5/3/1976      |
| 10      | Hamadya           | 35.5208       | 32.5199        | 1/2/2013      |
| 11      | Jerusalem St Anne | 35.236        | 31.7808        | 25/1/1982     |
| 12      | Shoval            | 34.746        | 31.4138        | 4/12/1994     |
| 13      | Urim              | 34.5245       | 31.3049        | 14/12/2013    |
| 14      | Revivim           | 34.7231       | 31.0448        | 11/2/1974     |
| 15      | Gesher            | 35.5534       | 32.6192        | 10/12/1974    |

Table S2. List of the meteorological stations used in this study.

| Station | Name               | Elevation<br>(m) | Latitude<br>(°N) | Longitude<br>(°E) | Period    | Missing<br>(%) |
|---------|--------------------|------------------|------------------|-------------------|-----------|----------------|
| 1       | Kefar Rosh Haniqra | 50               | 35.1149          | 33.0861           | 1970-2020 | 0.23           |
| 2       | Regba              | 20               | 35.0980          | 32.9755           | 1970-2020 | 0.33           |
| 3       | Kefar Hamakkabbi   | 25               | 35.1134          | 32.7915           | 1970-2020 | 0.01           |
| 4       | Haifa Port         | 5                | 34.9979          | 32.8223           | 1970-2020 | 0              |
| 5       | Nir Ezyon          | 210              | 34.989           | 32.6990           | 1970-2020 | 0              |
| 6       | Ramat Hashofet     | 250              | 35.0969          | 32.6121           | 1970-2020 | 0.09           |
| 7       | Ma'yan Zevi Fields | 10               | 34.9360          | 32.5756           | 1970-2020 | 0              |
| 8       | Regavim            | 105              | 35.0336          | 32.5228           | 1970-2020 | 0.01           |
| 9       | Binyamina Agr.     | 25               | 34.9469          | 32.5195           | 1970-2020 | 0              |
| 10      | Yad Hanna          | 55               | 35.0072          | 32.3255           | 1970-2020 | 0.01           |
| 11      | Bene Deror         | 30               | 34.9009          | 32.2629           | 1970-2020 | 0              |
| 12      | Eyal               | 75               | 34.9797          | 32.2123           | 1970-2020 | 0.02           |
| 13      | Kefar Shemaryahu   | 30               | 34.8185          | 32.1801           | 1970-2020 | 0              |
| 14      | Adanim             | 25               | 34.9025          | 32.1430           | 1970-2020 | 0.02           |
| 15      | Nahshonim          | 100              | 34.9510          | 32.0602           | 1970-2020 | 0.06           |
| 16      | Miqwe Yisrael      | 20               | 34.7846          | 32.0318           | 1970-2020 | 0              |
| 17      | Palmahim           | 20               | 34.7053          | 31.9340           | 1970-2020 | 0.37           |
| 18      | Kefar Bilu         | 65               | 34.8223          | 31.8758           | 1970-2020 | 0.07           |
| 19      | Nir Gallim         | 20               | 34.6831          | 31.8265           | 1970-2020 | 0.30           |
| 20      | Kefar Menahem      | 115              | 34.8346          | 31.7333           | 1970-2020 | 0.02           |
| 21      | Nizzanim Kibbuz    | 30               | 34.6352          | 31.7193           | 1970-2020 | 0              |
| 22      | Negba              | 85               | 34.6841          | 31.6616           | 1970-2020 | 0              |
| 23      | Talme Yafe         | 75               | 34.6148          | 31.6171           | 1970-2020 | 0.07           |
| 24      | Ziqim              | 30               | 34.5243          | 31.6077           | 1970-2020 | 0.02           |
| 25      | Nir Am             | 120              | 34.5791          | 31.5213           | 1970-2020 | 0              |
| 26      | Nahal Oz           | 80               | 34.4947          | 31.4726           | 1970-2020 | 0              |
| 27      | Magen              | 135              | 34.4253          | 31.301            | 1970-2020 | 0              |
| 28      | Yir'on             | 685              | 35.4553          | 33.0778           | 1970-2020 | 0              |
| 29      | Elon               | 320              | 35.2210          | 33.0630           | 1970-2020 | 0              |
| 30      | Zefat Har Kenaan   | 936              | 35.5070          | 32.9800           | 1970-2020 | 0              |
| 31      | Parod              | 450              | 35.4330          | 32.9322           | 1970-2020 | 0.02           |
| 32      | Sede Ilan          | 195              | 35.4259          | 32.7525           | 1970-2020 | 0.21           |
| 33      | Hazore'im          | -65              | 35.5038          | 32.7433           | 1970-2020 | 0.06           |
| 34      | Gazit              | 125              | 35.4472          | 32.6362           | 1970-2020 | 0              |
| 35      | Kefar Yehoshua     | 60               | 35.1515          | 32.6810           | 1970-2020 | 0.02           |
| 36      | Ginnegar           | 100              | 35.2563          | 32.6624           | 1970-2020 | 0.12           |
| 37      | Giv'at Oz          | 105              | 35.1986          | 32.5559           | 1970-2020 | 0              |
| 38      | Kefar Yehezqel     | 10               | 35.3617          | 32.5650           | 1970-2020 | 0.37           |
| 39      | Hamadya            | -165             | 35.5208          | 32.5199           | 1970-2020 | 0.01           |
| 40      | Sha'alvim          | 180              | 34.9830          | 31.8698           | 1970-2020 | 0              |
| 41      | Hulda              | 125              | 34.8838          | 31.8315           | 1970-2020 | 0.01           |
| 42      | Qiryat Anavim      | 660              | 35.1199          | 31.8098           | 1970-2020 | 0              |
| 43      | Jerusalem St Anne  | 740              | 35.2360          | 31.7808           | 1970-2020 | 0              |
| 44      | Beit Jimal Man     | 355              | 34.9762          | 31.7248           | 1970-2020 | 0              |
| 45      | Rosh Zurim         | 955              | 35.1264          | 31.6680           | 1970-2020 | 0.12           |
| 46      | Bet Guvrin         | 270              | 34.8934          | 31.6139           | 1970-2020 | 0              |
| 47      | Ruhamat            | 170              | 34.7063          | 31.4974           | 1970-2020 | 0.05           |
| 48      | Shoval             | 225              | 34.7460          | 31.4138           | 1970-2020 | 0              |
| 49      | Eshel Hanasi       | 190              | 34.6986          | 31.3243           | 1970-2020 | 0.32           |
| 50      | Urim               | 100              | 34.5245          | 31.3049           | 1970-2020 | 0.01           |
| 51      | Omer               | 330              | 34.8490          | 31.2725           | 1970-2020 | 0.13           |
| 52      | Gevulot            | 135              | 34.4676          | 31.2105           | 1970-2020 | 0.39           |
| 53      | Revivim            | 280              | 34.7231          | 31.0448           | 1970-2020 | 0              |

|           |            |      |         |         |           |      |
|-----------|------------|------|---------|---------|-----------|------|
| <b>54</b> | Sede Boqer | 475  | 34.7950 | 30.8702 | 1970-2020 | 0    |
| <b>55</b> | Kefar Blum | 75   | 35.6133 | 33.1716 | 1970-2020 | 0    |
| <b>56</b> | Gadot      | 120  | 35.6208 | 33.0165 | 1970-2020 | 0.42 |
| <b>57</b> | Almagor    | -10  | 35.6006 | 32.9122 | 1970-2020 | 0.21 |
| <b>58</b> | Haon       | -200 | 35.6248 | 32.7275 | 1970-2020 | 0.01 |
| <b>59</b> | Gesher     | -200 | 35.5534 | 32.6192 | 1970-2020 | 0    |
| <b>60</b> | Tirat Zevi | -220 | 35.5258 | 32.4222 | 1970-2020 | 0.03 |
| <b>61</b> | Sedom Man  | -388 | 35.3919 | 31.0306 | 1970-2020 | 0    |
| <b>62</b> | Elat       | 11   | 34.9542 | 29.5526 | 1970-2020 | 0    |
| <b>63</b> | Salfit     | 570  | 35.1805 | 32.0847 | 1970-2020 | 0.19 |
| <b>64</b> | Nabils     | 550  | 35.2608 | 32.2250 | 1970-2020 | 0    |
| <b>65</b> | Elqana     | 275  | 35.0381 | 32.1121 | 1982-2020 | 0.02 |
| <b>66</b> | Karmel     | 740  | 35.1841 | 31.4294 | 1982-2020 | 0.14 |

---

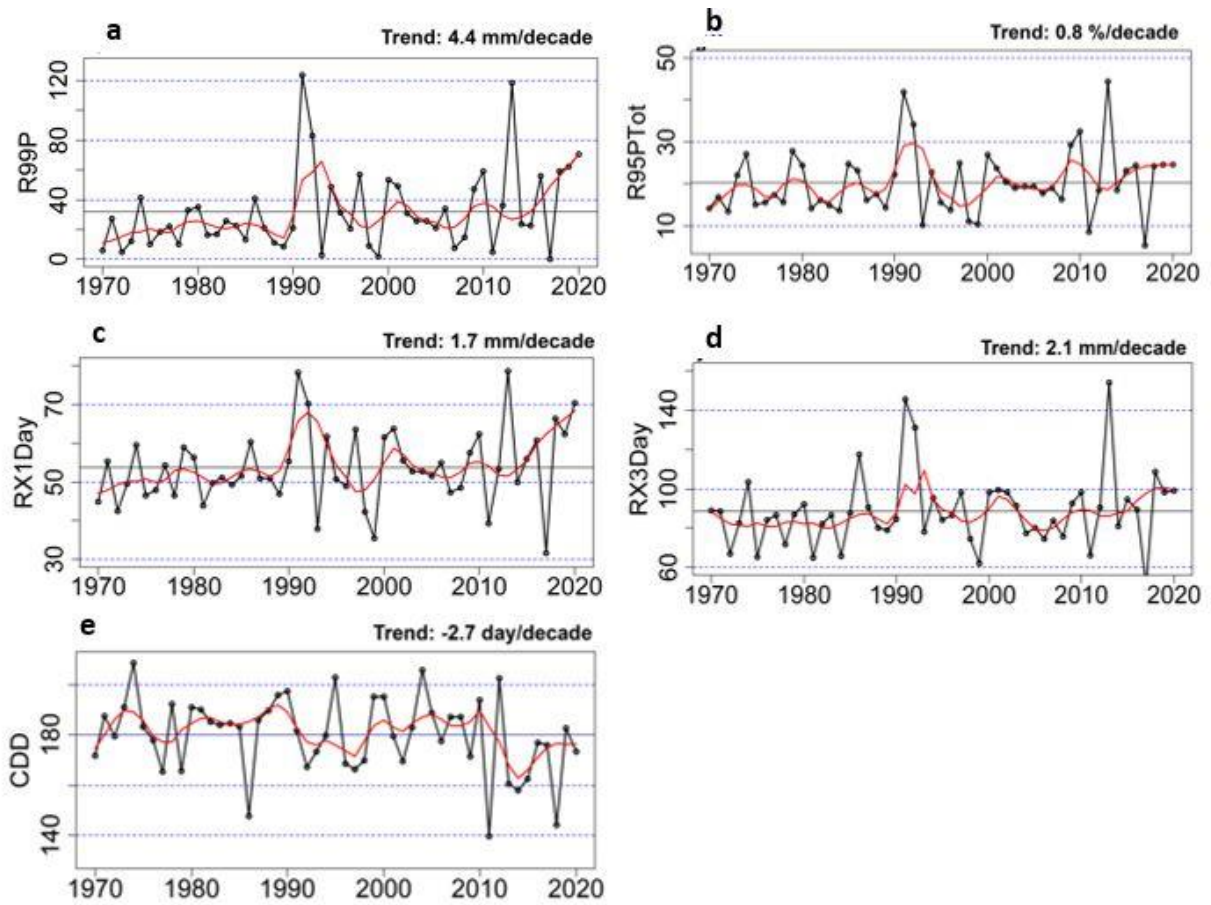

Figure S1. Temporal evolution for some averaged extreme rainfall indices over all stations, period 1970-2020. Red line is indicating a LOWESS smoothing.
